# Supplementary material for: Hypoxia-Elicited Mesenchymal Stem Cell-Derived Small Extracellular Vesicles Alleviate Myocardial Infarction by Promoting Angiogenesis through the miR-214/Sufu Pathway
Source: Hindawi journal article supplement (doi:10.1155/2023/1662182), 2023-01-13
Supplement: f1 [file 1662182.f1.pdf]

A

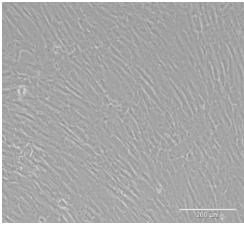

Hypoxia UMSCs

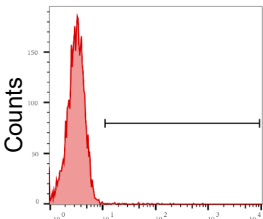

Blank

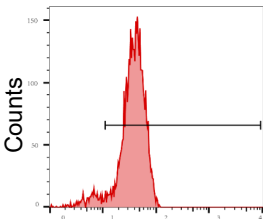

CD29

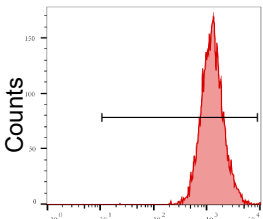

CD73

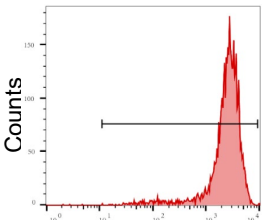

CD90

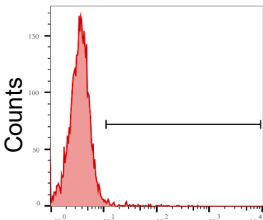

CD34

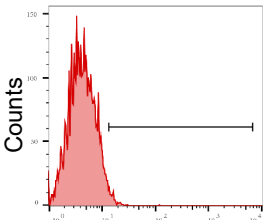

CD45

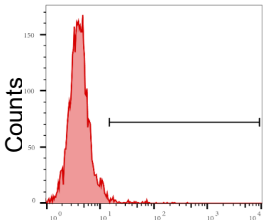

HLA-DR
